# Supplementary material for: Full-length haplotype reconstruction of CD36 by long-read sequencing: uncovers a novel structural variant
Source: Research Square preprint supplement (doi:10.21203/rs.3.rs-8004674/v1), 2025-11-23

**Figure 4. Gap-PCR screening for the structural variant in blood donors.** (B) Agarose gel electrophoresis. Lane M: Marker; NC: Negative control; PC: Positive control; Arrows indicate three heterozygous carriers (Sample 69, 81 and 223) showing both 333-bp control and 832-bp deletion-specific bands.


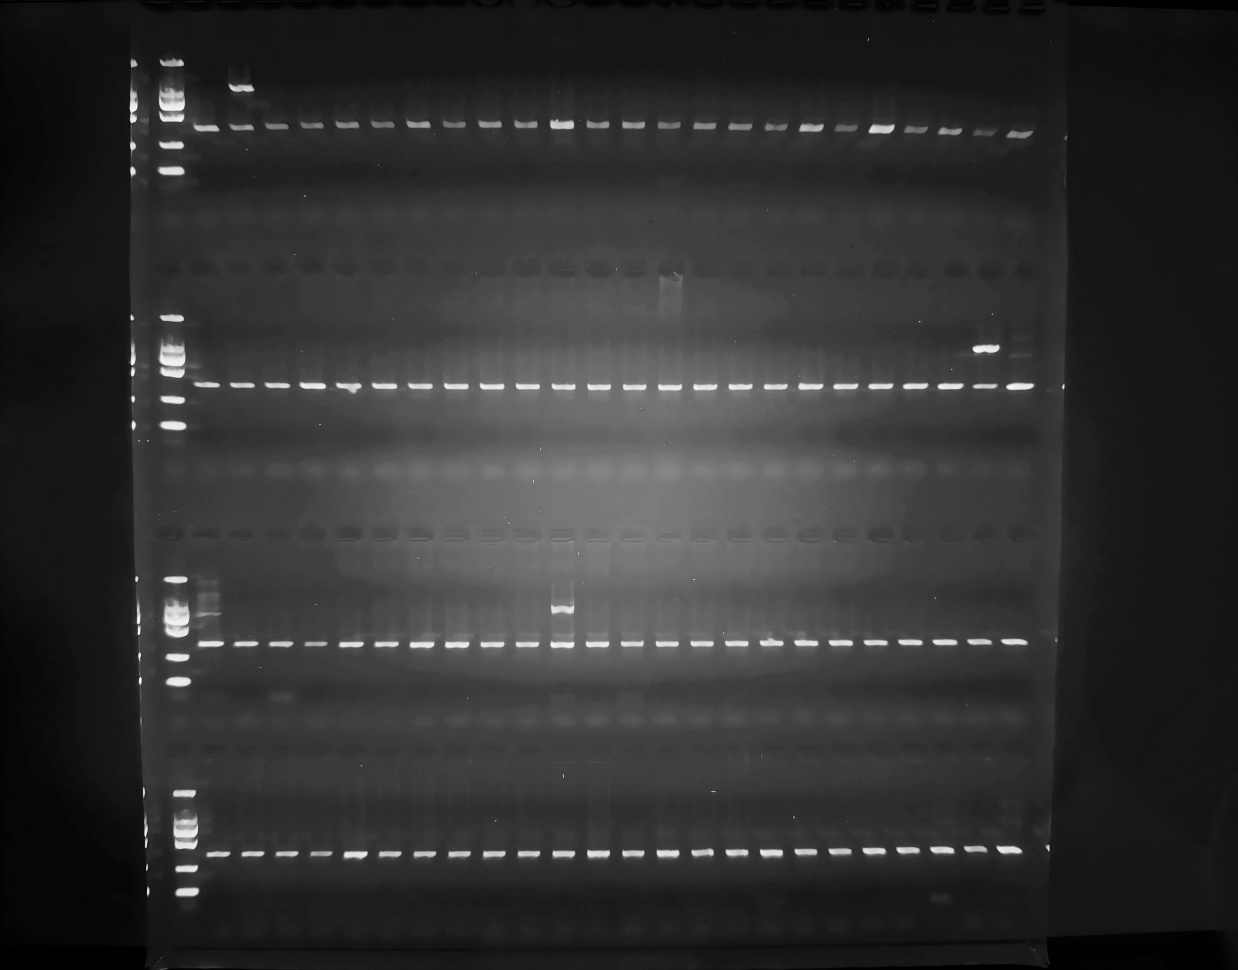

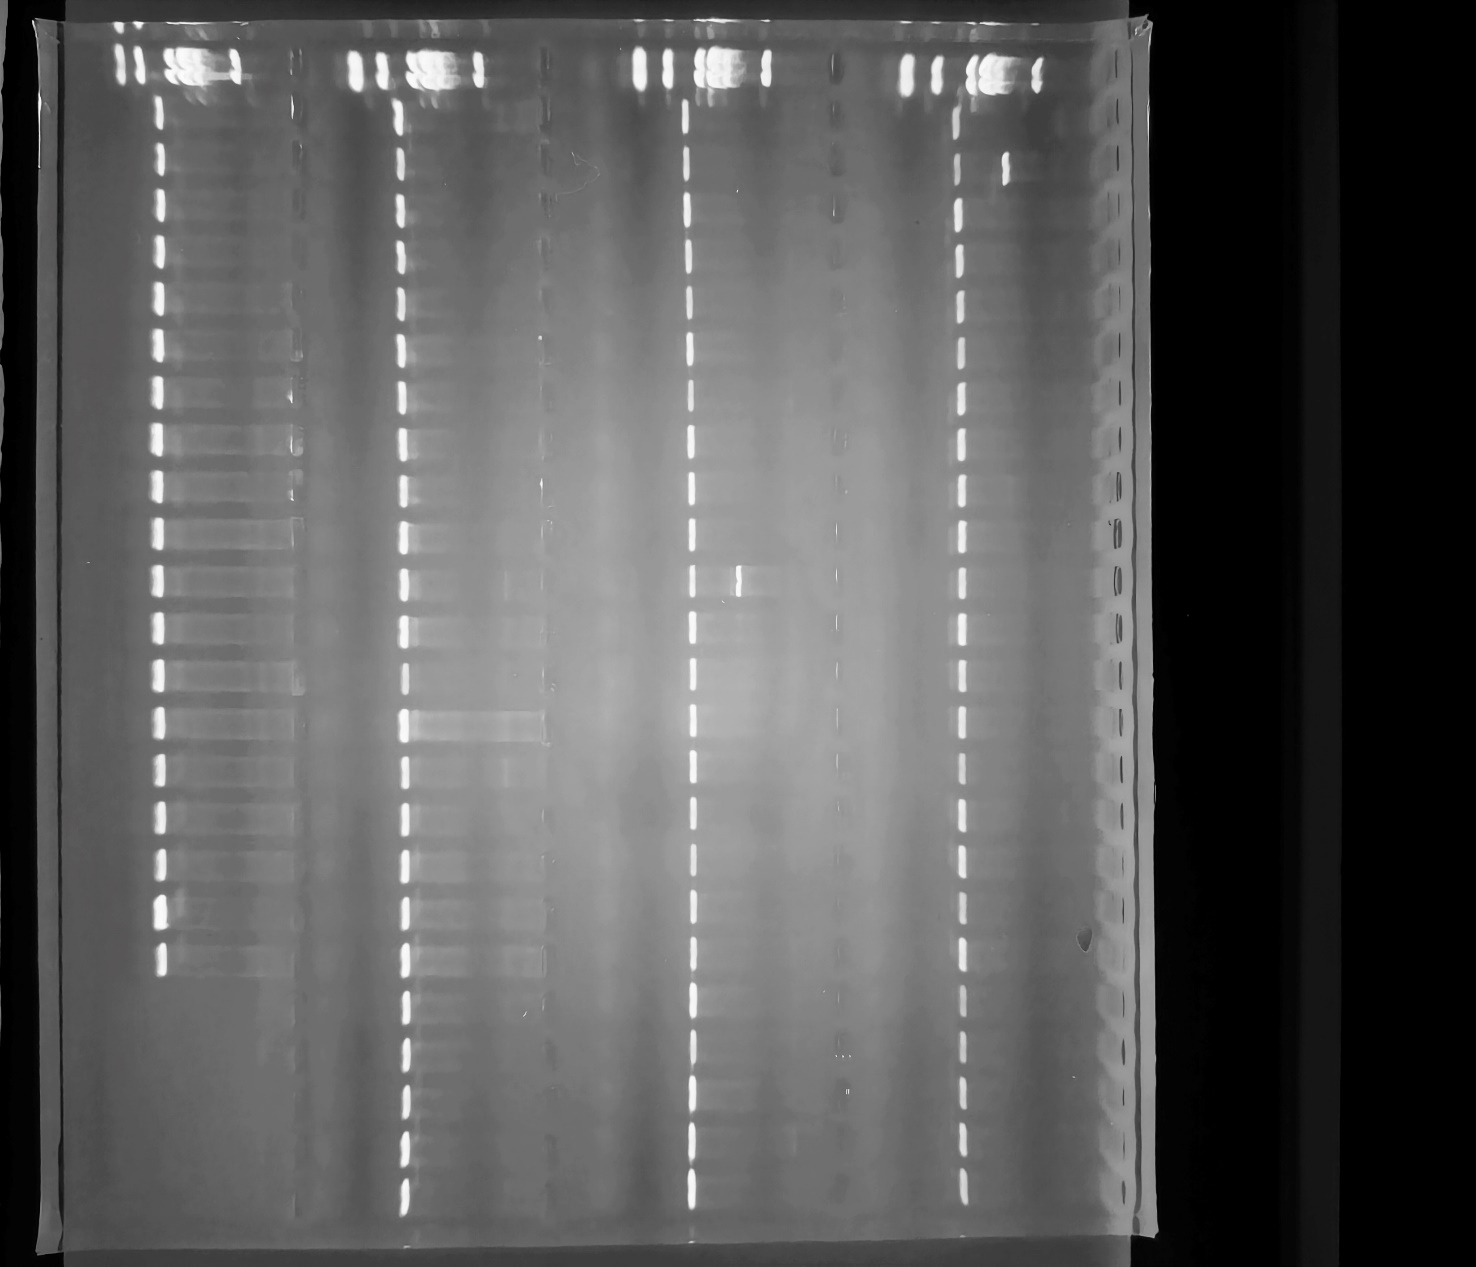

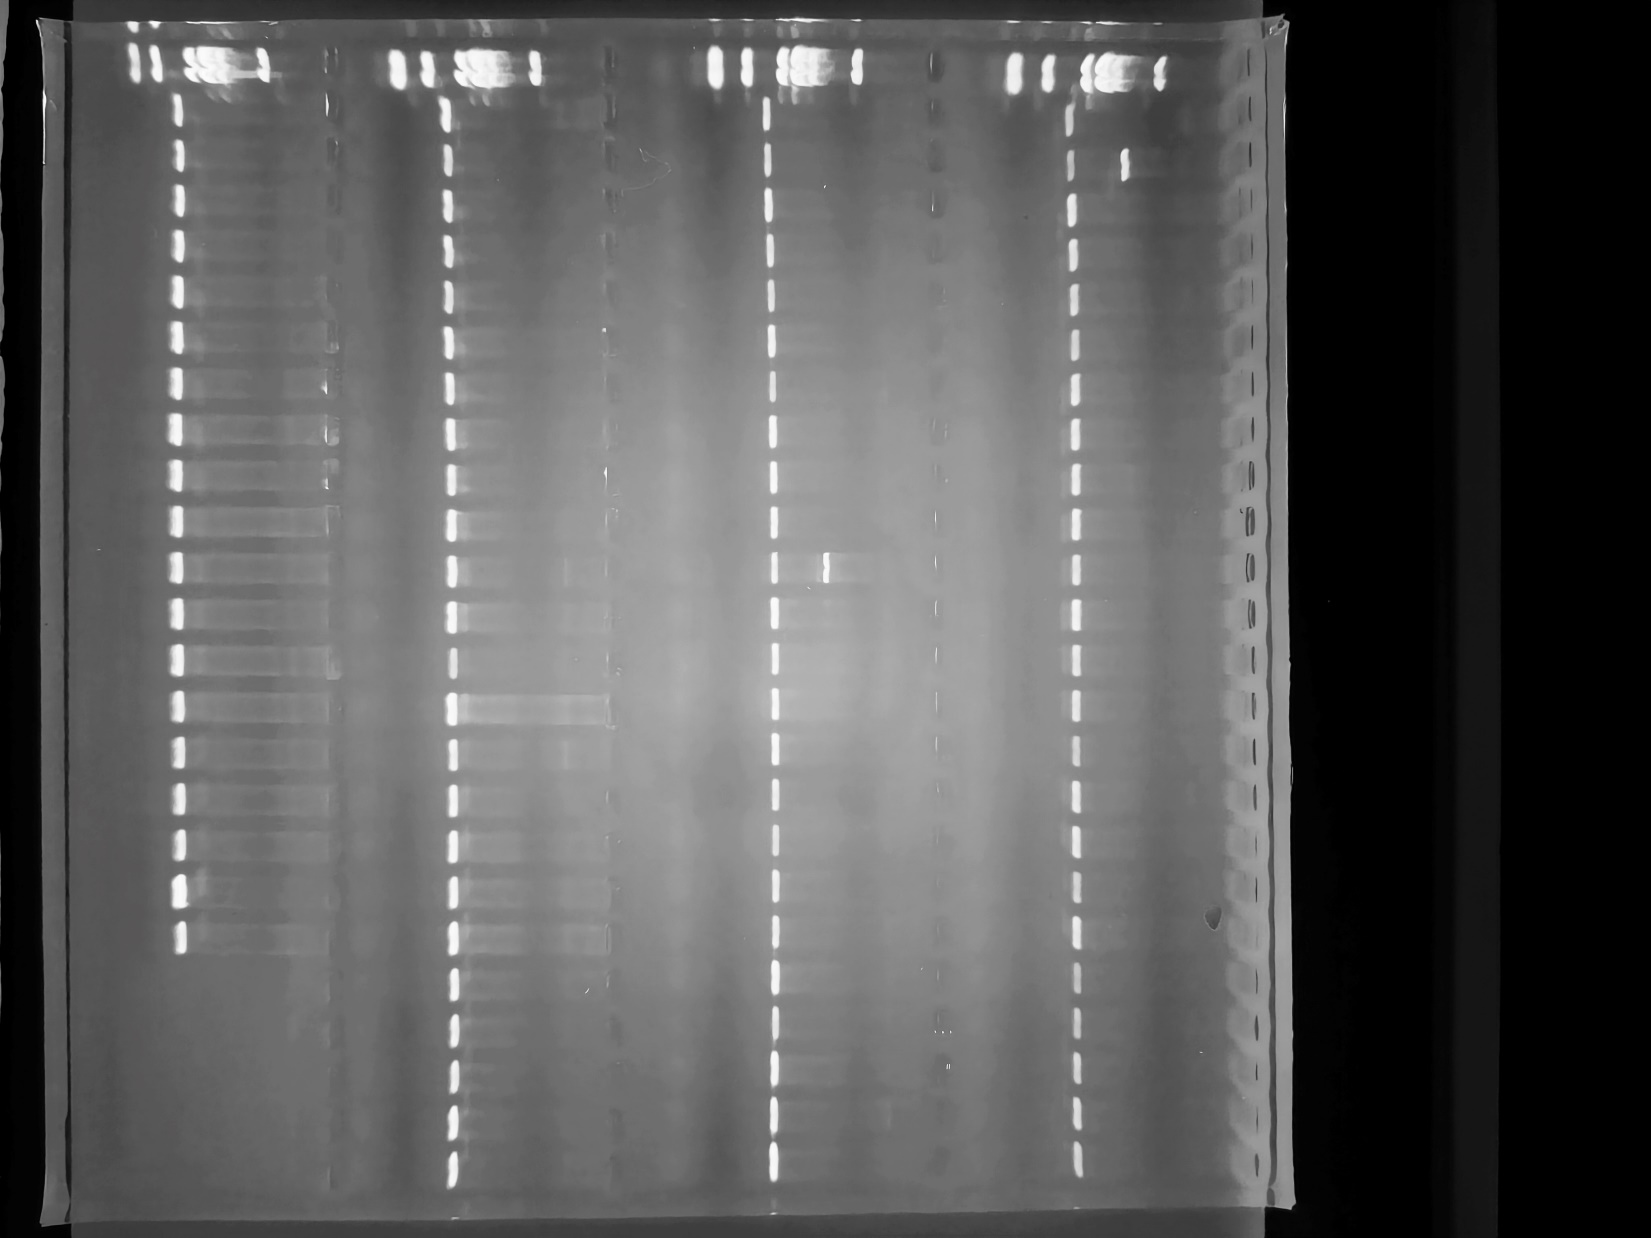

Supplement: Supplementary file 1 [file 71dbffcc4c4f59df497e8c0e.docx]
